# Supplementary material for: Significant changes in endogenous retinal gene expression assessed 1 year after a single intraocular injection of AAV-CNTF or AAV-BDNF
Source: PubMed Central journal article supplement — Mol Ther Methods Clin Dev. 2016 Dec 7;3:16078–. doi: 10.1038/mtm.2016.78 (PMC5142514; doi:10.1038/mtm.2016.78), 2016-12-07
Supplement: mtm201678-s1.pdf [file mtm201678-s1.pdf]

**Supplementary Table.**

Gene primers in the Qiagen Custom RT<sup>2</sup> Profiler PCR Array CAP10704R. Gene symbol, RefSeq number, gene name and Qiagen RT2 Catalog number.

| <b>Gene Symbol</b> | <b>Ref Seq #</b> | <b>Official Full Name</b>                              | <b>RT2 Catalog Number</b> |
|--------------------|------------------|--------------------------------------------------------|---------------------------|
| Akt1               | NM_033230        | V-akt murine thymoma viral oncogene homolog 1          | PPR45425                  |
| Arc                | NM_019361        | Activity-regulated cytoskeleton-associated protein     | PPR44661                  |
| Arg1               | NM_017134        | Arginase, liver                                        | PPR44521                  |
| Atf3               | NM_012912        | Activating transcription factor 3                      | PPR44403                  |
| Basp1              | NM_022300        | Brain abundant, membrane attached signal protein 1     | PPR49015                  |
| Bax                | NM_017059        | Bcl2-associated X protein                              | PPR06496                  |
| Bcl2               | NM_016993        | B-cell CLL/lymphoma 2                                  | PPR06577                  |
| Bdnf               | NM_012513        | Brain-derived neurotrophic factor                      | PPR45333                  |
| Camk2a             | NM_012920        | Calcium/calmodulin-dependent protein kinase II alpha   | PPR56567                  |
| Casp8              | NM_022277        | Caspase 8                                              | PPR06555                  |
| Cdc42              | NM_171994        | Cell division cycle 42 (GTP binding protein)           | PPR06471                  |
| Cdk5               | NM_080885        | Cyclin-dependent kinase 5                              | PPR06389                  |
| Cfl1               | NM_017147        | Cofilin 1, non-muscle                                  | PPR45477                  |
| Cntf               | NM_013166        | Ciliary neurotrophic factor                            | PPR43508                  |
| Cntfr              | NM_001003929     | Ciliary neurotrophic factor receptor                   | PPR50854                  |
| Creb1              | NM_031017        | CAMP responsive element binding protein 1              | PPR52804                  |
| Crebbp             | NM_133381        | CREB binding protein                                   | PPR56650                  |
| Cx3cr1             | NM_133534        | Chemokine (C-X3-C motif) receptor 1                    | PPR06709                  |
| Cyfp2              | NM_001106996     | Cytoplasmic FMR1 interacting protein 2                 | PPR49678                  |
| Dag1               | XM_343483        | Dystroglycan 1 (dystrophin-associated glycoprotein 1)  | PPR48906                  |
| Dpysl3             | NM_012934        | Dihydropyrimidinase-like 3                             | PPR53205                  |
| Egfr               | NM_031507        | Epidermal growth factor receptor                       | PPR48960                  |
| Eif4e              | NM_053974        | Eukaryotic translation initiation factor 4E            | PPR45341                  |
| Elk1               | XM_001055949     | ELK1, member of ETS oncogene family                    | PPR53876                  |
| Ep300              | XM_576312        | E1A binding protein p300                               | PPR50202                  |
| Fos                | NM_022197        | FBJ osteosarcoma oncogene                              | PPR55248                  |
| Gap43              | NM_017195        | Growth associated protein 43                           | PPR45124                  |
| Gda                | NM_031776        | Guanine deaminase                                      | PPR47913                  |
| Gdnf               | NM_019139        | Glial cell derived neurotrophic factor                 | PPR50730                  |
| Grb2               | NM_030846        | Growth factor receptor bound protein 2                 | PPR43063                  |
| Gria1              | NM_031608        | Glutamate receptor, ionotropic, AMPA 1                 | PPR06792                  |
| Gria2              | NM_017261        | Glutamate receptor, ionotropic, AMPA 2                 | PPR06753                  |
| Grin1              | NM_017010        | Glutamate receptor, ionotropic, N-methyl D-aspartate 1 | PPR06847                  |
| Gsk3b              | NM_032080        | Glycogen synthase kinase 3 beta                        | PPR44848                  |
| Hras               | XM_001062236     | Harvey rat sarcoma virus oncogene                      | PPR54834                  |
| Il6st              | NM_001008725     | Interleukin 6 signal transducer                        | PPR06402                  |
| Itgb1              | NM_017022        | Integrin, beta 1                                       | PPR48046                  |
| Itfka              | NM_031045        | Inositol 1,4,5-trisphosphate 3-kinase A                | PPR44533                  |
| Jak1               | NM_053466        | Janus kinase 1                                         | PPR52820                  |
| Jak2               | NM_031514        | Janus kinase 2                                         | PPR46731                  |
| Jun                | NM_021835        | Jun oncogene                                           | PPR53221                  |
| Klf4               | NM_053713        | Kruppel-like factor 4 (gut)                            | PPR43919                  |
| Klf6               | NM_031642        | Kruppel-like factor 6                                  | PPR47080                  |
| Klf7               | NM_001108800     | Kruppel-like factor 7 (ubiquitous)                     | PPR47723                  |
| Klf9               | NM_057211        | Kruppel-like factor 9                                  | PPR46842                  |
| Lif                | NM_022196        | Leukemia inhibitory factor                             | PPR06674                  |
| Lifr               | NM_031048        | Leukemia inhibitory factor receptor alpha              | PPR45926                  |

|          |              |                                                                                                                         |          |
|----------|--------------|-------------------------------------------------------------------------------------------------------------------------|----------|
| Limk1    | NM_031727    | LIM domain kinase 1                                                                                                     | PPR45325 |
| Limk2    | NM_024135    | LIM domain kinase 2                                                                                                     | PPR45170 |
| Maged1   | NM_053409    | Melanoma antigen, family D, 1                                                                                           | PPR50829 |
| Map2k1   | NM_031643    | Mitogen activated protein kinase kinase 1                                                                               | PPR43465 |
| Map2k2   | NM_133283    | Mitogen activated protein kinase kinase 2                                                                               | PPR52378 |
| Mapk1    | NM_053842    | Mitogen activated protein kinase 1                                                                                      | PPR48780 |
| Mapk3    | NM_017347    | Mitogen activated protein kinase 3                                                                                      | PPR42793 |
| Mapk8    | XM_341399    | Mitogen-activated protein kinase 8                                                                                      | PPR43333 |
| Mapk9    | NM_017322    | Mitogen-activated protein kinase 9                                                                                      | PPR44553 |
| Mapk10   | NM_012806    | Mitogen activated protein kinase 10                                                                                     | PPR44554 |
| Mapk14   | NM_031020    | Mitogen activated protein kinase 14                                                                                     | PPR52703 |
| Mtor     | NM_019906    | Mechanistic target of rapamycin (serine/threonine kinase)<br>Nerve growth factor receptor (TNFR superfamily, member 16) | PPR45168 |
| Ngfr     | NM_012610    |                                                                                                                         | PPR45155 |
| Nos1     | NM_052799    | Nitric oxide synthase 1, neuronal                                                                                       | PPR44930 |
| Nrp1     | NM_145098    | Neuropilin 1                                                                                                            | PPR45065 |
| Ntrk1    | NM_021589    | Neurotrophic tyrosine kinase, receptor, type 1                                                                          | PPR49157 |
| Ntrk2    | NM_012731    | Neurotrophic tyrosine kinase, receptor, type 2                                                                          | PPR45322 |
| Ntrk3    | NM_019248    | Neurotrophic tyrosine kinase, receptor, type 3                                                                          | PPR44584 |
| Ocm      | NM_012995    | Oncomodulin                                                                                                             | PPR44433 |
| Pick1    | NM_053460    | Protein interacting with PRKCA 1                                                                                        | PPR47907 |
| Plcg1    | NM_013187    | Phospholipase C, gamma 1                                                                                                | PPR45320 |
| Plcg2    | NM_017168    | Phospholipase C, gamma 2                                                                                                | PPR44457 |
| Pten     | NM_031606    | Phosphatase and tensin homolog                                                                                          | PPR47268 |
| Ptpn11   | NM_013088    | Protein tyrosine phosphatase, non-receptor type 11                                                                      | PPR53533 |
| Raf1     | NM_012639    | V-raf-leukemia viral oncogene 1                                                                                         | PPR48609 |
| Rac1     | NM_134366    | Ras-related C3 botulinum toxin substrate 1                                                                              | PPR48291 |
| Rapgef1  | XM_216018    | Rap guanine nucleotide exchange factor (GEF) 1<br>V-rel reticuloendotheliosis viral oncogene homolog A (avian)          | PPR52542 |
| Rela     | NM_199267    |                                                                                                                         | PPR46841 |
| Rhoa     | NM_057132    | Ras homolog gene family, member A                                                                                       | PPR56555 |
| Rock1    | NM_031098    | Rho-associated coiled-coil containing protein kinase 1                                                                  | PPR52792 |
| Stk24    | NM_001127494 | Serine/threonine kinase 24 (STE20 homolog, yeast)                                                                       | PPR55923 |
| Socs1    | NM_145879    | Suppressor of cytokine signaling 1                                                                                      | PPR52395 |
| Socs2    | NM_058208    | Suppressor of cytokine signaling 2                                                                                      | PPR06601 |
| Socs3    | NM_053565    | Suppressor of cytokine signaling 3                                                                                      | PPR06602 |
| Sort1    | NM_031767    | Sortilin 1                                                                                                              | PPR45348 |
| Stat1    | NM_032612    | Signal transducer and activator of transcription 1                                                                      | PPR48601 |
| Stat2    | NM_001011905 | Signal transducer and activator of transcription 2                                                                      | PPR47800 |
| Stat3    | NM_012747    | Signal transducer and activator of transcription 3                                                                      | PPR44745 |
| Tgfb1    | NM_021578    | Transforming growth factor, beta 1                                                                                      | PPR06430 |
| Tnf      | NM_012675    | Tumor necrosis factor (TNF superfamily, member 2)                                                                       | PPR06411 |
| Tnfrsf19 | NM_001044229 | Tumor necrosis factor receptor superfamily, member 19                                                                   | PPR49999 |
| Tp53     | NM_030989    | Tumor protein p53                                                                                                       | PPR06553 |
| Tsc2     | NM_012680    | Tuberous sclerosis 2                                                                                                    | PPR43470 |
| B2m      | NM_012512    | Beta-2 microglobulin                                                                                                    | PPR42607 |
| Rpl13a   | NM_173340    | Ribosomal protein L13A                                                                                                  | PPR53027 |
| Tfrc     | NM_022712    | Transferrin receptor                                                                                                    | PPR06732 |
| RGDC     | U26919       | Rat Genomic DNA Contamination                                                                                           | PPR63338 |
| RTC      | SA_00104     | Reverse Transcription Control                                                                                           | PPX63340 |
| PPC      | SA_00103     | Positive PCR Control                                                                                                    | PPX63339 |
